# Supplementary material
Source: PubMed Central journal article supplement (PMC1864892)
Supplement: amjpathol_170_3_967__1.pdf [file amjpathol_170_3_967__1.pdf]

Supplementary Information  
 Fig.1 Ootogawa *et al.*

|      |                      |            |                     |     |            |            |            |
|------|----------------------|------------|---------------------|-----|------------|------------|------------|
|      | <b>rabbit MFG-E8</b> |            | <b>human MFG-E8</b> | 480 | TGTTGTGGAC | ACAAGGTGCC | AGCCGCGCGG |
|      |                      |            |                     |     | *** ** **  | ** *****   | ***** **   |
|      |                      |            |                     |     | TGTGGT-GAC | GCAGGGTGCC | AGCCGCTTGG |
|      | GCAGCGCTGA           | GTACGTGAAG | ACCTTAAAGG          |     | TGGCCTACAG | CTTGGATGGG | CGCAAGTTCC |
|      | *** **               | **** **    | **** **             |     | ***** **   | * * **     | * * * **   |
| 510  | CCAGTCATGA           | GTACCTGAAG | GCCTTCAAGG          |     | TGGCCTACAG | CCTTAATGGA | CACGAATTCC |
|      | AGTTCATCCA           | GGAAGCGGAC | GGGTCTGGAG          |     | ACAAGGTGTT | TGCCGGTAAC | GTGGACAACA |
|      | * *****              | ** *       | *                   |     | ***** **   | ** *****   | * **** *   |
| 570  | ATTTTCATCCA          | TGATG--TT  | AATAAAAAAC          |     | ACAAGGAGTT | TGTGGGTAAC | TGGAACAAAA |
|      | GTGGACTGAA           | GACCAACCTG | TTGAGACCC           |     | CTCTGGAGGC | ACAGTATGTG | CGGTGTGACC |
|      | * ** *               | *****      | ** ** *             |     | ** *****   | ***** **   | * *****    |
| 628  | ACGCGGTGCA           | TGTCAACCTG | TTGAGACCC           |     | CTGTGGAGGC | TCAGTACGTG | AGATTGTACC |
|      | CCGTGACCTG           | CCACCGGGGC | TGCACCCTCC          |     | GCATGGAGCT | CCTGGGCTGT | GAGCTGAATG |
|      | ** * **              | **** ** *  | ***** ** *          |     | ** * **    | ***** **   | ***** **   |
| 688  | CCACGAGCTG           | CCACACGGCC | TGCACTCTGC          |     | GCTTTGAGCT | ACTGGGCTGT | GAGCTGAACG |
|      | GATGCTCAGA           | ACCCCTGGGC | CTAAAGGACA          |     | ACACTATCCC | CGACAAGCAG | ATCACGGCCT |
|      | ***** * *            | ***** **   | ** ** * *           |     | ***** **   | ***** **   | ***** **   |
| 748  | GATGCGCCAA           | TCCCTGGGC  | CTGAAGAATA          |     | ACAGCATCCC | TGACAAGCAG | ATCACGGCCT |
|      | CCAGCAGCTA           | CAAGACCTGG | GGCTGCGTG           |     | CCTTTGGCTG | GTATCCCTTC | TACGGGCGAC |
|      | ***** **             | ***** **   | *** ** *            |     | *** **     | * * **     | ** * ** *  |
| 808  | CCAGCAGCTA           | CAAGACCTGG | GGCTGCGTG           |     | TCTTCAGCTG | GAACCCCTCC | TATGCACGGC |
|      | TGGACAAGCA           | GGGCAAGTTC | AACGCCTGGA          |     | CGGCCAGAG  | TAATGACGCC | TCTGAGTGGC |
|      | ***** **             | ***** **   | ***** **            |     | ** **      | * * *      | * *****    |
| 868  | TGGACAAGCA           | GGGCAACTTC | AACGCCTGGG          |     | TTGCGGGGAG | CTACGGTAAC | GATCAGTGGC |
|      | TGCAGGTGGA           | CCTGGGTTCC | CAAAGCGGG           |     | TGACAGGCGT | CATCACCCAG | GGGGCTCGGG |
|      | ***** **             | ***** **   | *** **              |     | ***** **   | ***** **   | ***** **   |
| 928  | TGCAGGTGGA           | CCTGGGTTCC | CAAAGCGGG           |     | TGACAGGCGT | CATCACCCAG | GGGGCTCGGG |
|      | ACTTTGGCCA           | CATCCAGTAC | GTGGCAGCCT          |     | ACAAGGTGGC | CCACAGCAAC | GATGGCCGGA |
|      | ***** **             | ***** **   | ***** **            |     | ***** **   | * ** **    | ** * **    |
| 988  | ACTTTGGCTC           | TGTCCAGTTT | GTGGCAGCCT          |     | ACAAGGTGGC | CCACAGCAAC | GATGGCCGGA |
|      | ACTGGACCGA           | GTACAAGGAA | CAGGGGGCCA          |     | CGGACAGCAA | GGTTTCCCT  | GCAACCCTGG |
|      | ***** **             | **** **    | * ** *              |     | *** **     | * * *****  | * * * **   |
| 1048 | ACTGGACTGA           | GTACCAGGAC | CCCAGGACTG          |     | GCAGCAGTAA | GATCTTCCCT | GGCAACTGGG |
|      | ACAAC                |            |                     |     |            |            |            |
|      | **** *               |            |                     |     |            |            |            |
| 1106 | ACAAC                |            |                     |     |            |            |            |

**Figure S1.**  
 Comparison of rabbit and human MFG-E8 cDNA sequences.

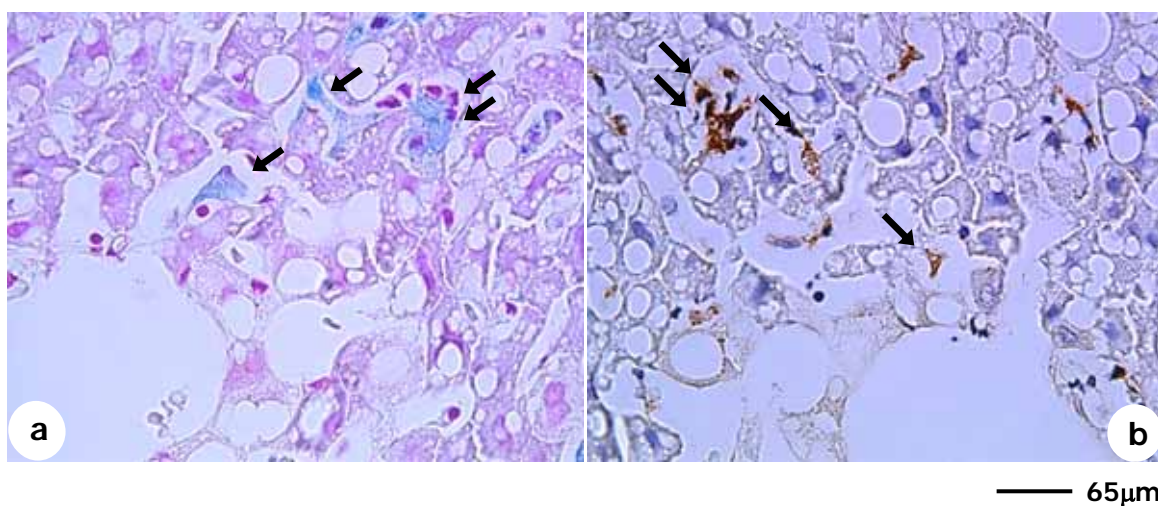

**Figure S2.**

Berlin blue staining (a) and immunostaining for RAM-11 (b) of HFD-fed rabbit liver. The specimen was sectioned transversally across the marked area. The photos were taken as "mirror images". Scale bar, 65  $\mu\text{m}$ .

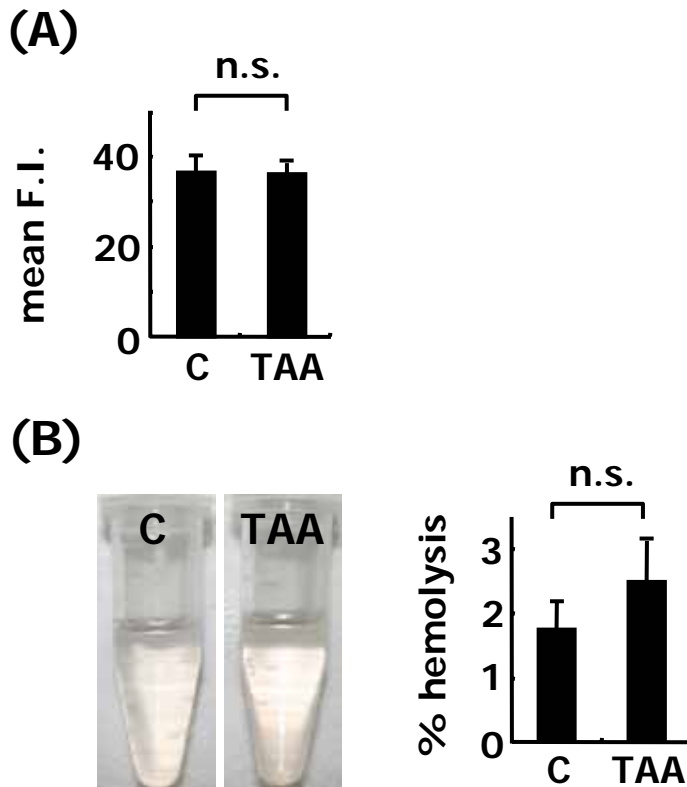

**Figure S3.**

(A) Externalization of phosphatidylserine in erythrocytes isolated from rabbits treated with 300 mg/kg of thiocetamide (TAA). Erythrocytes from control or TAA-treated rabbits were incubated with serum, and stained with FITC-conjugated annexin V. The FACS analysis was carried out using five independent samples, and the average values are plotted as bar graphs. Mean F.I.; mean fluorescence intensity. (B) Osmotic fragility of erythrocytes isolated from control or TAA-treated rabbits. A macroscopic view indicates no difference in fragility between erythrocytes from TAA-treated rabbits and those from control rabbits. Bar graphs present percent hemolysis with the maximal O.D. obtained at 100% hemolysis.
